1     **The relationship between payer type and quality of care for women undergoing**  
2             **emergency cesarean section at three hospitals in rural Uganda.**

3  
4     Jonathan Mwiindi<sup>1\*</sup>, Rigoberto Delgado<sup>2</sup>, Lee Revere<sup>3</sup>, Beth Wangigi<sup>1</sup>, Edward  
5     Muguthu<sup>1</sup>, Priscilla Busingye<sup>4</sup>

6  
7     <sup>1</sup>African Mission Healthcare, DeLand, Florida 32720

8     <sup>2</sup>School of Biomedical Informatics, The University of Texas Health Science Center at  
9     Houston, Houston, Texas 77030

10    <sup>3</sup>College of Public Health and Health Professions, University of Florida, Gainesville,  
11    Florida 32603

12    <sup>4</sup>Nkonzi Nsa Initiative, Rwibaale, Kyenjonjo District, Uganda

13  
14    **\*Corresponding author:**

15    E-mail: [jmwiindi@africanmissionhealthcare.org](mailto:jmwiindi@africanmissionhealthcare.org)

16  
17

18    **Study type:** Case-control Study

19

20    **Keywords:** C-section, rural hospital, payer type, length of stay.

21

22    **Synopsis:** Post-operative quality of care for emergency C-section cases, measured by  
23    length of stay in Ugandan rural hospitals, is impacted by case management.

24

## 25 **Abstract**

### 26 **Background**

27 The study examined the relationship between payer type, and quality of care among  
28 mothers who deliver through emergency cesarean section in rural Ugandan hospitals.

### 29 **Methods**

30 We analyzed retrospective, de-identified patient data from three rural private-not-for-  
31 profit hospitals in Uganda. Two groups were included in the study, a self-payer patient  
32 group and a group fully sponsored by an international funding organization. The data  
33 was analyzed using hierarchical linear regression models comparing length of stay  
34 against payer type, and controlling for patient age, education level, parity, and indication  
35 for C-section. Length of stay (LOS) was assumed to represent a realistic proxy variable  
36 for patient quality of care.

### 37 **Results**

38 The self-pay group had statistically significant longer postoperative LOS (surgery to  
39 clinical discharge), and longer aggregate LOS, or admission to clinical discharge,  
40 compared to the sponsored group. Payer type was not significant in the admission-to-  
41 decision LOS, but payer type was highly significant for aggregate LOS ( $p < .001$ ).

### 42 **Conclusion**

43 Case management in rural Ugandan hospitals influences quality of post-operative care  
44 for patients undergoing emergency C-sections. Expanding surgical funding, combined

45 with effective case management approaches, is likely to increase quality of surgical care  
46 as measured by length of stay.

47

## 48 Introduction

49 Deliveries by cesarean section (C-section) continue to rise globally accounting for 21%  
50 of all live childbirths; compared to only 7% in 1990 [1]. C-sections are essential in  
51 situations such as prolonged or obstructed labor, fetal distress, or abnormal  
52 presentation of the baby. However, access to these life-saving procedures is greatly  
53 determined by a patient's geographical location [1]; the more rural a patient is located  
54 the harder it is to access surgical services [2]. About 8% of women in least developed  
55 countries give birth by caesarean section, and the rate decreases to 5% in sub-Saharan  
56 Africa [1]. Although in Uganda 88% of all the surgeries performed are related to  
57 pregnancy [3], and only 1 in 3 women who need a C-section receive one [4]; in rural  
58 areas such disproportion is estimated to be even greater [5].

59 Factors associated with lack of access to C-sections in most African countries,  
60 especially in rural settings, include faulty equipment, limited skilled healthcare  
61 workforce, unavailability of transportation (including a lack of money to pay for  
62 transport), inadequate health facilities, and delays in seeking emergency care [6] [7].

63 Another important factor is the perception of the patient population towards cesarean  
64 sections. A study by Nakimuli et al. (2015) concluded that increased fear of delivery via  
65 C-section among Ugandan women created delays in seeking required obstetric care [8].

66 Lastly, is the relative costs of these interventions which many families are unable to  
67 afford. Such factors, combined with delays at healthcare facilities, complicate  
68 conditions for many mothers resulting in the need for emergency C-section (ECS)  
69 [9];[10].

70 In Uganda, 62.5% of private and missionary hospitals provide the three most common  
71 surgeries in this country: C-section, laparotomy, and open fracture repair [2]. Improving  
72 access to healthcare services for low-income mothers in Uganda’s rural areas also  
73 depends on the involvement of different foundation programs, which offer support in the  
74 form of medical supplies, specialist expertise, or service-specific funding. Given that  
75 these support programs can play an important role in the health systems of the region, it  
76 is important to understand their impact in terms of health outcomes; particularly, there is  
77 limited research into the effect of programs which provide full cost coverage for ECS in  
78 low-income countries. The objective of this study was to examine the relationship  
79 between payer type (self-paying patients and patients whose care is supported) and  
80 quality of care among mothers who deliver through emergency cesarean section in rural  
81 Ugandan hospitals. The study uses the case of African Mission Healthcare (AMH), a  
82 foundation which partners with private-not- for -profit (PNFP) hospitals to cover costs of  
83 surgical care for indigent patients through its Surgery Access for Everyone program  
84 (SAFE). It is expected that the results of this study will serve to improve healthcare  
85 policy making to support rural hospitals.

86

## 87 **Methods**

88 The study analyzed retrospective, de-identified patient data from three rural PNFP  
89 hospitals operating under the Uganda Catholic Medical Bureau (UCMB), Uganda. Two  
90 of these hospitals, Nyakibale and Rushoroza, formed part of the SAFE program, while  
91 the third, Ibanda Hospital, did not receive any SAFE benefits and was used as a control.

92 The three hospitals are located in Southwestern Uganda, between 308 and 410 km  
93 from Kampala, the capital city. The three hospitals serve approximately 40,000 patients  
94 annually. Nyakibale is a 200-bed hospital with approximately 90 healthcare workers,  
95 Rushoroza is a 93-bed hospital with approximately 34 health workers, while Ibanda is a  
96 178-bed hospital with 88 healthcare workers. The study data included two patient  
97 groups: 1) study group composed of patients whose delivery costs were covered  
98 entirely by the SAFE program given their extreme poverty conditions; and 2) the control,  
99 or self-payer group, composed of patients who had no health insurance and had all out-  
100 of-pocket expenses related to the delivery. In addition to covering the cost of ECS care,  
101 the SAFE program requires participating hospitals to comply with stipulated quality of  
102 care indicators, and accuracy of patient data collected. Quality checks are performed  
103 daily by personnel funded by SAFE, and comprise assessments of patient pre-operation  
104 profiles, post-operation feedback, and quarterly clinical audits. The patient sample was  
105 of convenience and included all records of women who had received emergency C-  
106 section in the three study hospitals between January and August 2020.

107 The statistical analysis consisted of frequency tables, mean differences, and used two  
108 hierarchical linear regression models assessing patient length of stay (LOS) against  
109 payer-type (self-pay and SAFE), and controlling for patient age, education level, parity  
110 (number of previous deliveries), and indication for C-section (fetal distress, previous  
111 scar, malpresentation and maternal compromise). Number of living children was not  
112 included in the models since this variable was not reported in the patient records  
113 reviewed. The dependent variable in the first regression model was decision to delivery  
114 interval (DDI), referring to the time between when the provider determines the patient

115 requires a C-section and the time when the baby is delivered. The second model used  
116 as dependent a variable denominated as aggregate LOS, or the time lapse between a  
117 patient's admission and clinical discharge. The term clinical discharge is used here to  
118 denote the event when a patient is considered able to leave the hospital only in terms of  
119 their health condition. Since hospitals in Uganda traditionally do not discharge a patient  
120 until full payment is made, it is important to distinguish between clinical discharge and  
121 actual hospital discharge. Thus, considering clinical discharge allowed us to estimate  
122 differences in post-operative LOS, controlling for differences in capacity to pay between  
123 the two patient groups. The purpose of modeling aggregate LOS was to evaluate  
124 separately the two elements that compose this variable: 1) the DDI; and 2) the  
125 postoperative (post-surgical) LOS. This breakdown facilitated the examination of quality  
126 service in terms of speed of service delivery (DDI), and to obtain metrics which can be  
127 used to benchmark against country averages of clinical and non-clinical aspects of post-  
128 surgical care (postoperative LOS). When surgical patients prolonged LOS, the risk of  
129 surgical site infections (SSI) increases [11].

130 Thus, LOS is a good proxy for measuring quality of surgical care. The shorter the LOS  
131 the better the quality of the service offered. In both regression models, LOS was  
132 assumed to represent a realistic proxy variable for quality of care [12]. DDI, for example,  
133 is an important risk factor of maternal mortality and poor neonatal outcomes [13]. All  
134 variables in the models were assessed for normality and multi-collinearity. The study  
135 used SPSS 2020 version 7.0 (SPSS Inc., Chicago, Ill., USA), and statistical significance  
136 was evaluated at the generally accepted level,  $\alpha = .05$ .

137

138 Having Ibanda hospital, a non-SAFE institution, in the sample allowed to control for  
139 possible biases resulting from the quality checks performed by the SAFE program team  
140 members. The study received IRB approval from the University of Texas Health Science  
141 Center at Houston, Texas, USA, and from the Mbarara University of Science and  
142 Technology, Mbarara, Uganda. Given that the study involved retrospective, de-identified  
143 patient data, informed consent was waived.

144

## 145 **RESULTS**

146 As shown in table 1, a total of patient 771 records were included in this study; thirty five  
147 (35) were excluded from the analysis due to incomplete data leaving 736 records. Of  
148 these, 378 were in the Self-payer group and 358 were part of the SAFE ECS program.  
149 Ibanda hospital only had patients from the Self-pay group (291 patients), while  
150 Rushoroza and Nyakibale hospitals had both patient groups represented. Majority of  
151 the participants were married (Self-pay 68%; SAFE, 95%), and mostly received an  
152 emergency C-section (Self-pay 91%; SAFE, 98%). The mean average age was 26 (SD  
153 6.17) and 27 (SD 6.35) for the Self-pay and SAFE groups, respectively. Maternal  
154 compromise (Self-pay 30%, SAFE 22%) and previous scar (Self-pay 28%, SAFE 33%)  
155 were the most common indications for emergency C-sections. In addition, there were no  
156 fetal losses for the patients in this cohort and nearly all (99%) did not have a surgical  
157 site infection.

158

159



160 Table 1: General Characteristics of the Study Participants, by Payer Group

161

| Characteristic          | Self-Pay       | SAFE           |
|-------------------------|----------------|----------------|
|                         | <i>n</i> = 378 | <i>n</i> = 358 |
| Study site              |                |                |
| Ibanda                  | 291 (77%)      | 0 (0%)         |
| Nyakibale               | 69 (18%)       | 219 (61%)      |
| Rushoroza               | 18 (5%)        | 139 (39%)      |
| Marital status          |                |                |
| Married                 | 256 (68%)      | 341 (95%)      |
| Single                  | 0 (0%)         | 12 (3%)        |
| Separated               | 0 (0%)         | 5 (1%)         |
| Missing                 | 122 (32%)      | 0 (0%)         |
| Surgery Type            |                |                |
| Emergency C-section     | 344 (91%)      | 350 (98%)      |
| Elective C-section      | 33 (9%)        | 8 (2%)         |
| Indication of C-section |                |                |
| Maternal Compromise     | 112 (30%)      | 77 (22%)       |
| Previous Scar           | 104 (28%)      | 118 (33%)      |
| Dystocia                | 66 (17%)       | 63 (18%)       |
| Malpresentation         | 51 (13%)       | 55 (15%)       |
| Fetal Distress          | 45 (12%)       | 45 (13%)       |
| Surgical Site Infection |                |                |
| No                      | 376 (99%)      | 355 (99%)      |
| Yes                     | 2 (1%)         | 3 (1%)         |
| Birth outcome           |                |                |
| Alive                   | 355 (94%)      | 343 (96%)      |
| Dead                    | 23 (6%)        | 13 (4%)        |

162 *Note.* Due to rounding errors, column-wise percentages may not equal 100%.

163

164 The results from mean differences analysis, presented in Table 2, indicates shows that

165 there were statistically significant differences between payer types for postoperative

166 LOS, or surgery to discharge time ( $p < .001$ ), and aggregate LOS; the time between  
 167 admission and clinical discharge ( $p < .001$ ). This indicates that the Self-pay group on  
 168 average had significantly longer postoperative and aggregate LOS in comparison to the  
 169 SAFE payer group, but the same mean DDI compared to SAFE patients. There was no  
 170 statistical difference in mean age, number of previous deliveries, or DDI between the  
 171 two groups.

172

173 Table 2: Analysis of Payer Groups Mean Differences for Selected Patient Characteristics  
 174

| Variable                                         | <i>x</i> | <i>SD</i> | <i>n</i> | Min   | Max    | <i>t</i> (734) | <i>p</i> |
|--------------------------------------------------|----------|-----------|----------|-------|--------|----------------|----------|
| Patient Age                                      |          |           |          |       |        | -1.71          | .088     |
| Self-Pay                                         | 26.32    | 6.17      | 378      | 13.00 | 47.00  |                |          |
| SAFE                                             | 27.11    | 6.35      | 358      | 15.00 | 43.00  |                |          |
| Number of previous deliveries                    |          |           |          |       |        | 0.61           | .542     |
| Self-Pay                                         | 2.80     | 1.91      | 378      | 1.00  | 13.00  |                |          |
| SAFE                                             | 2.71     | 1.82      | 358      | 1.00  | 9.00   |                |          |
| DDI - admission to surgery (hours)               |          |           |          |       |        | 1.05           | .294     |
| Self-Pay                                         | 16.47    | 23.53     | 378      | 0.12  | 136.33 |                |          |
| SAFE                                             | 14.70    | 22.07     | 358      | 0.00  | 117.45 |                |          |
| Postoperative LOS – surgery to discharge (hours) |          |           |          |       |        | 16.77          | <.001    |
| Self-Pay                                         | 98.89    | 27.48     | 378      | 18.08 | 251.80 |                |          |
| SAFE                                             | 71.24    | 15.17     | 358      | 9.78  | 154.25 |                |          |
| Aggregate LOS – admission to discharge (hours)   |          |           |          |       |        | 12.82          | <.001    |
| Self-Pay                                         | 115.36   | 34.34     | 378      | 33.50 | 255.83 |                |          |
| SAFE                                             | 85.94    | 27.30     | 358      | 12.00 | 250.33 |                |          |

175 *Note.* *x* = mean; *SD* = standard deviation, *n* = sample size, *t* = statistic from the  
 176 independent samples t-test

177

178

## 179 **Decision-Delivery Interval - Admission to Surgery.**

180 Table 3 presents the results of the hierarchical linear regression analysis predicting DDI  
181 (admission to surgery) against payer type. The three models (steps 1-3) were  
182 statistically significant, and in all steps the signs of the estimated coefficients, and  
183 degree of statistical significance, remained the same for all variables supporting the  
184 observations presented in this section. The explained variation ( $R^2$ ) was relatively small  
185 in all three models. In Step 1,  $F(2, 733) = 3.65, p=0.026 (R^2 = 0.010)$ , patient age  
186 showed significant statistical evidence of association with DDI ( $\beta = 0.11, p = .029$ ),  
187 indicating that older patients reported longer hours between admission and delivery  
188 compared to younger patients. The number of previous deliveries showed a highly  
189 significant relationship with DDI ( $\beta = -0.14, p = .008$ ), suggesting that number of  
190 previous deliveries was inversely related to number of hours a patient experienced on  
191 the DDI.

192 In Step 2,  $F(6, 729) = 3.80, p = 0.001, (R^2 = .030)$ , the number of previous deliveries  
193 remained highly significant ( $\beta = -0.14, p = .007$ ). In addition, two indications for C-  
194 section were highly significant; previous scars ( $\beta = 0.15, p = .004$ ) and maternal  
195 compromise ( $\beta = 0.15, p = .003$ ), suggesting that these patients had longer DDI  
196 compared to those showing only conditions of dystocia, the reference variable. In Step  
197 3,  $F(7, 728) = 3.47, p = 0.001, (R^2 = 0.032)$ , patient age showed statistical significance ( $\beta$   
198  $= -0.10, p = .048$ ), while number of previous deliveries ( $\beta = -0.15, p = .005$ ), previous  
199 scars ( $\beta = 0.15, p = .004$ ), and maternal compromise ( $\beta = 0.14, p = .004$ ) were highly  
200 significant as factors of DDI variation. Fetal distress, and malpresentation showed no  
201 evidence of statistical relationship with DDI, and as compared to the reference variable

202 dystocia. Further, no significant difference was found between women in the SAFE  
 203 group compared to the Self-pay group regarding DDI.

204

205 **Table 3:** Hierarchical Regression Analysis Predicting DDI

| Model steps                                                      | <i>B</i> | <i>SE</i> | $\beta$ | <i>t</i> | <i>p</i> |
|------------------------------------------------------------------|----------|-----------|---------|----------|----------|
| <b>Model 1</b>                                                   |          |           |         |          |          |
| Patient age                                                      | 0.41     | 0.19      | 0.11    | 2.19     | .029*    |
| Number of previous deliveries                                    | -1.68    | 0.63      | -0.14   | -2.67    | .008**   |
| <b>Model 2</b>                                                   |          |           |         |          |          |
| Patient age                                                      | 0.35     | 0.19      | 0.10    | 1.86     | .064     |
| Number of previous deliveries                                    | -1.70    | 0.63      | -0.14   | -2.69    | .007**   |
| <i>Indications of C-section (dystocia as reference variable)</i> |          |           |         |          |          |
| Fetal distress                                                   | 2.85     | 3.11      | 0.04    | 0.92     | .360     |
| Previous scar                                                    | 7.37     | 2.55      | 0.15    | 2.89     | .004**   |
| Malpresentation                                                  | 0.74     | 2.99      | 0.01    | 0.25     | .804     |
| Maternal compromise                                              | 7.59     | 2.59      | 0.15    | 2.93     | .003**   |
| <b>Step 3</b>                                                    |          |           |         |          |          |
| Patient age                                                      | 0.37     | 0.19      | 0.10    | 1.98     | .048*    |
| Number of previous deliveries                                    | -1.78    | 0.64      | -0.15   | -2.80    | .005**   |
| <i>Indications of C-section (dystocia as reference variable)</i> |          |           |         |          |          |
| Fetal distress                                                   | 2.86     | 3.11      | 0.04    | 0.92     | .358     |
| Previous scar                                                    | 7.44     | 2.55      | 0.15    | 2.92     | .004**   |
| Malpresentation                                                  | 0.79     | 2.99      | 0.01    | 0.27     | .791     |
| Maternal compromise                                              | 7.40     | 2.59      | 0.14    | 2.86     | .004**   |
| <i>Payer Type (self-pay as reference variable)</i>               |          |           |         |          |          |
| Safe                                                             | -2.05    | 1.68      | -0.04   | -1.22    | .224     |

206 *Note.* *B*= unstandardized coefficient; *SE*= standard error;  $\beta$ = standardized coefficient;  
 207 Significance is at  $p \leq 0.05$ .

208

209 **Aggregate LOS - Admission to Discharge.**

210 Table 4 presents the results of the hierarchical linear regression analysis predicting

211 aggregate LOS against payer type. The model in Step 1 was not significant with none of

212 its two variables indicating statistical significance. In Step 2,  $F(6, 729) = 2.42, p = .025,$   
 213  $(R^2 = .020),$  maternal compromise ( $\beta = 0.15, p = .003$ ) showed highly significant  
 214 association with aggregate LOS compared to dystocia. This finding indicates that  
 215 patients with maternal compromise remained for a longer period between admission  
 216 and clinical discharge compared to those patients without maternal compromise.

217

218 Table 4: Hierarchical Regression Analysis Model Predicting Aggregate LOS

| Model steps                                                      | <i>B</i> | <i>SE</i> | $\beta$ | <i>t</i> | <i>p</i> |
|------------------------------------------------------------------|----------|-----------|---------|----------|----------|
| <b>Model 1</b>                                                   |          |           |         |          |          |
| Patient age                                                      | -0.26    | 0.28      | -0.05   | -0.93    | .355     |
| Number of previous deliveries                                    | 0.26     | 0.96      | 0.01    | 0.27     | .785     |
| <b>Model 2</b>                                                   |          |           |         |          |          |
| Patient age                                                      | -0.29    | 0.28      | -0.05   | -1.02    | .309     |
| Number of previous deliveries                                    | 0.50     | 0.96      | 0.03    | 0.52     | .604     |
| <i>Indications of C-section (dystocia as reference variable)</i> |          |           |         |          |          |
| Fetal distress                                                   | 4.91     | 4.71      | 0.05    | 1.04     | .298     |
| Previous scar                                                    | 3.46     | 3.86      | 0.05    | 0.90     | .370     |
| Malpresentation                                                  | -1.10    | 4.53      | -0.01   | -0.24    | .808     |
| Maternal compromise                                              | 11.60    | 3.92      | 0.15    | 2.96     | .003**   |
| <b>Model 3</b>                                                   |          |           |         |          |          |
| Patient age                                                      | 0.07     | 0.26      | 0.01    | 0.26     | .796     |
| Number of previous deliveries                                    | -0.61    | 0.87      | -0.03   | -0.70    | .485     |
| <i>Indications of C-section (dystocia as reference variable)</i> |          |           |         |          |          |
| Fetal distress                                                   | 5.08     | 4.28      | 0.05    | 1.19     | .235     |
| Previous scar                                                    | 4.48     | 3.50      | 0.06    | 1.28     | .201     |
| Malpresentation                                                  | -0.37    | 4.11      | -0.00   | -0.09    | .929     |
| Maternal compromise                                              | 8.96     | 3.56      | 0.11    | 2.52     | .012*    |
| <i>Payer Type (self-pay as reference variable)</i>               |          |           |         |          |          |
| Safe                                                             | -29.07   | 2.31      | -0.42   | -12.56   | < .001** |

219 *Note.* *B*= unstandardized coefficient; *SE*= standard error;  $\beta$ = standardized coefficient;  
 220 Significance is at  $p \leq 0.05$ .

221

222 In Step 3,  $F(7, 728) = 25.04$ ,  $p < .001$ , ( $R^2 = .194$ ), both maternal compromise ( $\beta = 0.11$ ,  
223  $p = .012$ ) and payer type ( $\beta = -0.42$ ,  $p < .001$ ) showed significant and highly significant  
224 association, respectively, with aggregate LOS. This finding provides strong evidence  
225 that patients under the SAFE program spent considerably less time in hospital  
226 compared to those patients in the Self-pay group. In both models the signs of the  
227 coefficient and degree of significance for all variables remained the same. The  
228 coefficient of determination ( $R^2$ ) in the last model was considerably higher accounting  
229 for almost 20% of variation.

230

## 231 Discussion

232 This study investigated the relationship between payer type and the length of stay  
233 (LOS) of mothers who deliver by emergency C-section in rural hospitals of Uganda. Two  
234 patient groups formed part of the study: the Self-pay, patients paying entirely out-of-  
235 pocket for medical services; and the group supported by the Surgery Access for  
236 Everyone (SAFE) program managed by the foundation African Mission Healthcare. On  
237 average, patients in the SAFE group had shorter aggregate LOS than patients in the  
238 Self-pay group, considering both time intervals of surgery to clinical discharge (71.24 vs  
239 98.89 hrs. for SAFE and Self-pay patients, respectively), and aggregate LOS, or  
240 admission to clinical discharge (85.94 hrs. vs. 115.36 hrs.). Thus, a woman paying for  
241 herself was more likely to spend an additional 29 hours in the hospital than a woman  
242 whose emergency C-section was sponsored.. Since the mean decision-to delivery time  
243 interval (DDI) was statistically the same between the Self-pay and SAFE patient groups,

244 differences in aggregate LOS between the two payer types are likely due to mean  
245 length differences in the post-discharge LOS (surgery to clinical discharge). This  
246 statement is also supported by the results from the regression analysis. Factors such  
247 as patient age, previous deliveries, and indications of C-section played a significant role  
248 explaining DDI variation, however, payer type was not a significant variable (Table 3). In  
249 contrast, payer type was a significant variable explaining variation in aggregate LOS,  
250 along with maternal compromise (Table 4).

251 Given that DDI provides a broad indicator of performance during a critical level of  
252 surgical care, statistically similar estimates of mean DDI likely indicate that patients in  
253 both payer groups receive similar quality treatment during a C-section. Post-surgical  
254 care, on average, involves less urgent medical attention, and mean statistical  
255 differences in this metric could reflect dissimilarities in quality of recovery care and case  
256 management. One important feature of the SAFE program, which helps explain lower  
257 LOS for its beneficiaries, is its process of an intensive approach to case management.  
258 The case management is carried out by a hospital employee. Case management  
259 involves communicating with clinicians to help ensure a patient's recovery progress,  
260 handling complaints, and guiding patients through the discharge process. While the  
261 case manager is not likely to be involved in the DDI process, the systematic case  
262 management during the post-surgery period likely contributes to reducing aggregate  
263 LOS.

264 The observed average DDI mean estimates for both Self-pay and SAFE patient groups  
265 (16.47 hrs. and 14.70 hrs., respectively) are consistent with findings from other studies  
266 in Uganda - DDI ranges of 12:00 - 20:00 hours [14] - and neighboring Tanzania and

267 Kenya - only 12% and 3% of hospitals in these two countries, respectively, had DDI  
268 time frames as low as 75-minutes [13][15]. These findings, however, underline an  
269 ongoing challenge regarding C-section procedures in Uganda, if compared to the 30-  
270 min DDI benchmark recommended in developed countries [16]. DDI differences may  
271 be due to general infrastructure and economic factors such as a lack of surgical funds  
272 and a skilled health worker to patient ratio [17], or severe lack of medication, equipment,  
273 and operating rooms [18]. These factors highlight the fact that there are no DDI  
274 recommendations for low- and middle-income countries like Uganda [19-21], and the  
275 results of this study are contributing to quantifying current DDI time frames.

276 The study encountered some limitations. First, due to data constraints, estimates of DDI  
277 were calculated considering time between admission and surgery, and not from when  
278 the decision for a C-section and to when the surgery took place. This could have  
279 resulted in an overestimation of DDI for both payer groups. Second, the clinical  
280 discharge time was not indicated in the patient charts in Ibanda and Rushoroza  
281 hospitals. Instead, clinical discharge time for patients in these hospitals was considered  
282 to be 9:00am, the start of general rounds. This may have underestimated post-surgery  
283 LOS in the control arm. There are opportunities for further research, including  
284 measuring long-term patient quality of life differences between payer types. Also, there  
285 is the need to study the association between LOS and the referring facility post-  
286 discharge to measure effectiveness of patient follow-up.

287

## 288 **Conclusion**



289 The findings of this study highlight a significant difference in LOS between mothers  
290 whose ECS are sponsored by payers compared to mothers who pay out-of-pocket --  
291 using clinical discharge time to control for ability to pay. No differences in surgical  
292 outcomes were found between payer groups, but a proactive case management  
293 approach was likely the key factor contributing to differences in post-surgery quality of  
294 care. Therefore, funding for ECS should be expanded, especially for poor, rural women  
295 who would otherwise have limited access surgery.

296

## 297 **Acknowledgments**

298 The authors thank Dr. Joseph Kolars, Dr. Wendy Nyamusana, Sr. Gertrude  
299 Kabanyomozi, Sr. Miria Mazire, and Sr. Mary Mangdalene for their assistance in the  
300 collection of data and revisions of the manuscript.

301

## 302 **Author Contributions**

|                               |                                                                    |
|-------------------------------|--------------------------------------------------------------------|
| <b>Conceptualization</b>      | Jonathan Mwiindi, Rigoberto Delgado, Lee Revere                    |
| <b>Data Curation</b>          | Jonathan Mwiindi, Beth Wangigi, Edward Muguthu, Priscilla Busingye |
| <b>Formal Analysis</b>        | Jonathan Mwiindi                                                   |
| <b>Investigation</b>          | Jonathan Mwiindi, Beth Wangigi, Edward Muguthu, Priscilla Busingye |
| <b>Methodology</b>            | Jonathan Mwiindi, Rigoberto Delgado, Lee Revere                    |
| <b>Project Administration</b> | Jonathan Mwiindi                                                   |

|                                                 |                                                   |
|-------------------------------------------------|---------------------------------------------------|
| <b>Resources</b>                                | Jonathan Mwiindi                                  |
| <b>Supervision</b>                              | Rigoberto Delgado                                 |
| <b>Validation</b>                               | Jonathan Mwiindi, Rigoberto Delgado, Beth Wangigi |
| <b>Writing – Original<br/>Draft Preparation</b> | Jonathan Mwiindi, Rigoberto Delgado, Lee Revere   |
| <b>Writing – Review &amp;<br/>Editing</b>       | Jonathan Mwiindi, Rigoberto Delgado               |

303

304

305

306

## 307 References

- 308 1. WHO (2021). *Caesarean Section Rates Continue to rise, amid Growing Inequalities in*  
309 *Access*. [online] Available at: [https://www.who.int/news/item/16-06-2021-caesarean-](https://www.who.int/news/item/16-06-2021-caesarean-section-rates-continue-to-rise-amid-growing-inequalities-in-access)  
310 [section-rates-continue-to-rise-amid-growing-inequalities-in-access](https://www.who.int/news/item/16-06-2021-caesarean-section-rates-continue-to-rise-amid-growing-inequalities-in-access)
- 311 2. Albutt, K., Drevin, G., Yorlets, R. R., Svensson, E., Namanya, D. B., Shrimpe, M.  
312 G., & Kayima, P. (2019). 'We are all serving the same Ugandans': A nationwide  
313 mixed-methods evaluation of private sector surgical capacity in Uganda. *PloS*  
314 *One*, 14(10), e0224215. <https://doi.org/10.1371/journal.pone.0224215>
- 315 3. Löfgren, J., Kadobera, D., Forsberg, B. C., Mulwooza, J., Wladis, A., & Nordin,  
316 P. (2015). Surgery in district hospitals in rural Uganda-indications, interventions,  
317 and outcomes. *Lancet*, 385(Suppl 2), S18. [https://doi.org/10.1016/S0140-](https://doi.org/10.1016/S0140-6736(15)60813-3)  
318 [6736\(15\)60813-3](https://doi.org/10.1016/S0140-6736(15)60813-3)
- 319 4. Sobhy, S., Arroyo-Manzano, D., Murugesu, N., Karthikeyan, G., Kumar, V.,  
320 Kaur, I., Fernandez, E., Gundabattula, S. R., Betran, A. P., Khan, K., Zamora, J.,  
321 & Thangaratinam, S. (2019). Maternal and perinatal mortality and complications  
322 associated with caesarean section in low-income and middle-income countries:  
323 A systematic review and meta-analysis. *Lancet*, 393(10184), 1973–1982.  
324 [https://doi.org/10.1016/S0140-6736\(18\)32386-9](https://doi.org/10.1016/S0140-6736(18)32386-9)
- 325 5. Boatin, A. A., Schlotheuber, A., Betran, A. P., Moller, A. B., Barros, A., Boerma,  
326 T., Torloni, M. R., Victora, C. G., & Hosseinpoor, A. R. (2018). Within country  
327 inequalities in caesarean section rates: observational study of 72 low and middle  
328 income countries. *BMJ (Clinical research ed.)*, 360, k55.  
329 <https://doi.org/10.1136/bmj.k55>

- 330 6. Dusabe, J., Akuze, J., Kisakye, A. N., Kwesiga, B., Nsubuga, P., & Ekirapa, E.  
331 (2018). A case-control study of factors associated with caesarean sections at  
332 health facilities in Kabarole District, Western Uganda, 2016. *Pan African Medical*  
333 *Journal*, 29(1), 1–9. <https://doi.org/10.11604/pamj.2018.29.179.14870>
- 334 7. Yaya, S., Okonofua, F., Ntoimo, L., Kadio, B., Deuboue, R., Imongan, W., &  
335 Balami, W. (2018). Increasing women’s access to skilled pregnancy care to  
336 reduce maternal and perinatal mortality in rural Edo State, Nigeria: A  
337 randomized controlled trial. *Global Health Research and Policy*, 3(1), 12.  
338 <https://doi.org/10.1186/s41256-018-0066-y>
- 339 8. Nakimuli, A., Nakubulwa, S., Kakaire, O., Osinde, M. O., Mbalinda, S. N.,  
340 Nabirye, R. C., Kakande, N., & Kaye, D. K. (2015). Incidence and determinants  
341 of neonatal morbidity after elective caesarean section at the national referral  
342 hospital in Kampala, Uganda. *BMC Research Notes*, 8(1), 624.  
343 <https://doi.org/10.1186/s13104-015-1617-7>
- 344 9. Conlon, C. M., Serbanescu, F., Marum, L., Healey, J., LaBrecque, J., Hobson,  
345 R., Levitt, M., Kekitiinwa, A., Picho, B., Soud, F., Spigel, L., Steffen, M., Velasco,  
346 J., Cohen, R., & Weiss, W. (2019). Saving mothers, giving life: It takes a system  
347 to save a mother. *Global Health, Science and Practice*, 7(Suppl 1), S6–S26.  
348 <https://doi.org/10.9745/GHSP-D-18-00427>
- 349 10. Nelson, J. P. (2017). Indications and appropriateness of caesarean sections  
350 performed in a tertiary referral centre in Uganda: A retrospective descriptive  
351 study. *The Pan African Medical Journal*, 26.  
352 <https://doi.org/10.11604/pamj.2017.26.64.9555>

- 353 11. Mujagic, E., Marti, W. R., Coslovsky, M., Soysal, S. D., Mechera, R., von Strauss, M., ... &  
354 Weber, W. P. (2018). Associations of hospital length of stay with surgical site  
355 infections. *World journal of surgery*, 42(12), 3888-3896.
- 356 12. Clarke, A., & Rosen, R. (2001). Length of stay: how short should hospital care  
357 be?. *The European Journal of Public Health*, 11(2), 166-170.
- 358 13. Hirani, B. A., Mchome, B. L., Mazuguni, N. S., & Mahande, M. J. (2017). The  
359 decision delivery interval in emergency caesarean section and its associated  
360 maternal and fetal outcomes at a referral hospital in northern Tanzania: A cross-  
361 sectional study. *BMC Pregnancy and Childbirth*, 17(1), 411.  
362 <https://doi.org/10.1186/s12884-017-1608-x>
- 363 14. Hughes, N. J., Namagembe, I., Nakimuli, A., Sekikubo, M., Moffett, A., Patient,  
364 C. J., & Aiken, C. E. (2020). Decision-to-delivery interval of emergency  
365 caesarean section in Uganda: A retrospective cohort study. *BMC Pregnancy and*  
366 *Childbirth*, 20(1), 324. <https://doi.org/10.1186/s12884-020-03010-x>
- 367 15. Kamotho D, Pertet AM, Ogwayo I: Decision to incision interval for emergency  
368 caesarean section and postoperative outcomes in a resource limited rural  
369 Kenyan public hospital. *International Journal of Reproduction, Contraception,*  
370 *Obstetrics and Gynecology* 2016, 7(7):2574
- 371 16. Gupta, S., Naithani, U., Madhanmohan, C., Singh, A., Reddy, P., & Gupta, A.  
372 (2017). Evaluation of decision-to-delivery interval in emergency caesarean  
373 section: A 1-year prospective audit in a tertiary care hospital. *Journal of*  
374 *Anaesthesiology, Clinical Pharmacology*, 33(1), 64–70.  
375 <https://doi.org/10.4103/0970-9185.202197>

- 376 17. Kitaw, T.M., Limenh, S.K., Chekole, F.A., Getie, S.A., Gemed, B.N. and Engda,  
377 A.S. (2021). Decision to delivery interval and associated factors for emergency  
378 cesarean section: a cross-sectional study. *BMC Pregnancy and Childbirth*, 21(1).
- 379 18. Niyitegeka, J., Nshimirimana, G., Silverstein, A., Odhiambo, J., Lin, Y.,  
380 Nkurunziza, T., Riviello, R., Rulisa, S., Banguti, P., Magge, H., Macharia, M.,  
381 Habimana, R., & Hedt-Gauthier, B. (2017). Longer travel time to district hospital  
382 worsens neonatal outcomes: A retrospective cross-sectional study of the effect  
383 of delays in receiving emergency caesarean section in Rwanda. *BMC*  
384 *Pregnancy and Childbirth*, 17(1), 242. [https://doi.org/10.1186/s12884-017-1426-](https://doi.org/10.1186/s12884-017-1426-1)  
385 [1](https://doi.org/10.1186/s12884-017-1426-1)
- 386 19. Onuoha, O., Ramaswamy, R., Srofenyoh, E. K., Kim, S. M., & Owen, M. D.  
387 (2015). The effects of resource improvement on decision-to-delivery times for  
388 caesarean deliveries in a Ghanaian regional hospital. *International Journal of*  
389 *Gynecology and Obstetrics: The Official Organ of the International Federation of*  
390 *Gynecology and Obstetrics*, 130(3), 274–278.  
391 <https://doi.org/10.1016/j.ijgo.2015.03.032>
- 392 20. Mbonye, A. K., Asimwe, J. B., Kabarangira, J., Nanda, G., & Orinda, V. (2007).  
393 Emergency obstetric care as the priority intervention to reduce maternal mortality  
394 in Uganda. *International Journal of Gynecology & Obstetrics*, 96(3), 220–225.  
395 <https://doi.org/10.1016/j.ijgo.2006.12.017>
- 396 21. Mgawadere, F., Unkels, R., Kazembe, A., & van den Broek, N. (2017). Factors  
397 associated with maternal mortality in Malawi: Application of the three delays

398 model. *BMC Pregnancy Childbirth*, 17, 219. <https://doi.org/10.1186/s12884-017->  
399 [1406-5](https://doi.org/10.1186/s12884-017-1406-5)  
400
